# Supplementary material
Source: Springer Nature journal article supplement (https://www.springermedizin.de/resource/supplementary/12890_2014_566_MOESM1_ESM.pdf/9505336)

a)  $CA_{NO}$  (ppb)

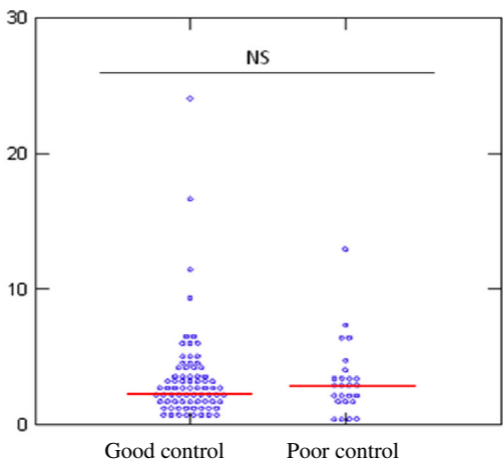

b)  $J'_{awNO}$  (pl/s)

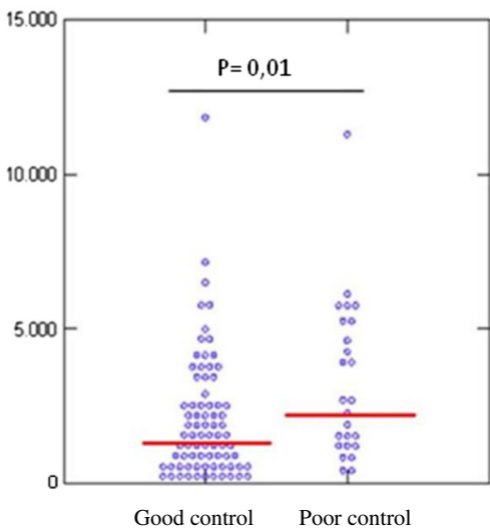

Supplement: MOESM1 [file 9505336]
